# Supplementary material for: Synthesis, structures, and properties of alkali and alkaline earth coordination polymers based on V-shaped ligand
Source: Royal Society of Chemistry journal article supplement (doi:10.1039/c2ce25589h), 2012-01-01
Supplement: c2ce25589h.pdf [file c2ce25589h.pdf]

Supporting Information for

## Synthesis, Structures, and Properties of alkali and alkaline earth coordination polymers based on V-shaped ligand

Pei-Chi Cheng,<sup>a</sup> Feng-Shuen Tseng,<sup>b</sup> Chun-Ting Yeh,<sup>b</sup> Ting-Guang Chang,<sup>b</sup> Ching-Che Kao,<sup>b</sup> Chia-Her Lin,<sup>b\*</sup> Wei-Ren Liu,<sup>c\*</sup> Jenn-Shing Chen<sup>d\*</sup> and Vítězslav Zima<sup>e</sup>

<sup>a</sup>Department of Chemistry, R&D Center for Membrane Technology, Center for Nanotechnology, Chung-Yuan Christian University, Chung-Li 320, Taiwan. <sup>b</sup>Department of Chemistry, Chung-Yuan Christian University, Chungli 320, Taiwan. Fax: +886-3-2653399; Tel: +886-3-2653315; E-mail: chiaher@cycu.edu.tw. <sup>c</sup>Department of Chemical Engineering, Chung-Yuan Christian University, Chungli 320, Taiwan. <sup>d</sup>Department of Applied Chemistry, National University of Kaohsiung, Kaohsiung City 811, Taiwan. <sup>e</sup>Joint Laboratory of Solid State Chemistry, University of Pardubice, Studentska 84, 532 10 Pardubice, Czech Republic.

### Experiments

Fig. S1. The coordination models of OBA ligand in **1–3** and **6–8**.

Fig. S2. The diagrams of H-nbonding interactions of **2–3** and **6–8**.

**Fig. S3. The schematic descriptions of the 3D topology of 1–3 and 7–8.**

Fig. S4. Powder XRD patterns of **1**.

Fig. S5. Powder XRD patterns of **2**.

Fig. S6. Powder XRD patterns of **3**.

Fig. S7. Powder XRD patterns of **4**.

Fig. S8. Powder XRD patterns of **5**.

Fig. S9. Powder XRD patterns of **6**.

Fig. S10. Powder XRD patterns of **7**.

Fig. S11. Powder XRD patterns of **8**.

Fig. S12. FT-IR spectra of **1–8**.

Fig. S13. The TGA curves of (a) **1–5**; (b) **6–8**.

Fig. S14. Scanning electron micrographs for **1**.

**Fig. S15. Powder XRD patterns of residue product of (a) 6, (b) 7, and (c) 8 after the TG analysis.**

Table S1. Selected bond lengths (Å) for **1–8**.

Table S2. Hydrogen Bonding Distance (Å) and Angle (deg) Data for **2–8**.

## Experiments

**Synthesis of [Li<sub>2</sub>(OBA)] (1).** A reaction mixture of 4,4'-oxybisbenzoic acid (C<sub>14</sub>H<sub>10</sub>O<sub>5</sub>, H<sub>2</sub>OBA, 0.2582 g, 1 mmol), LiOH (0.1437 g, 6 mmol), *N,N*-dimethylformamide (DMF, 10.0 ml), and H<sub>2</sub>O (1.0 ml) was stirred for 20 min at room temperature forming a homogeneous solution with a pH value of 7.85. The solution was heated at 120 °C for 2 days. Colorless crystals of **1** were filtered off, washed with ethanol (EtOH), dried at 50 °C in an oven, and collected with the yield of 0.2218 g (82.0 %, based on the H<sub>2</sub>OBA reagent). Elemental analysis found/calcd.: C, 62.34/62.25; H, 2.69/2.98 % for **1**. IR (KBr, cm<sup>-1</sup>): 3069(s), 2961(w), 2562(w), 1913(s), 1594(s), 1547(s), 1411(s), 1256(s), 1154(s), 1100(m), 999(w), 863(s), 782(s), 708(w), 565(w), 484(s).

**Synthesis of [Na<sub>2</sub>(OBA)(H<sub>2</sub>O)] (2).** A reaction mixture of H<sub>2</sub>OBA (0.1291 g, 0.5 mmol), NaOH (0.1200 g, 3 mmol), methanol (10.0 ml), and H<sub>2</sub>O (1.0 ml) was stirred for 20 min at room temperature forming a homogeneous solution with a pH value of 13.41. The solution was heated at 120 °C for 2 days. Colorless crystals of **2** were filtered off, washed with EtOH, dried at 50 °C in an oven, and collected with the yield of 0.0911 g (57.0 %, based on H<sub>2</sub>OBA). Elemental analysis found/calcd.: C, 52.44/52.51; H, 2.70/3.15 % for **2**. IR (KBr, cm<sup>-1</sup>): 3258(br), 1688(w), 1594(s), 1540(s), 1400(s), 1255(s), 1147(s), 1087(m), 1005(m), 1022(w), 877(s), 796(s), 704(s), 647(w), 491(s), 430(w).

**Synthesis of [K(HOBA)] (3).** A reaction mixture of H<sub>2</sub>OBA (0.1291 g, 0.5 mmol), KOH (0.0561 g, 1.0 mmol), DMF (10.0 ml), and H<sub>2</sub>O (1.0 ml) was stirred for 20 min at room

temperature forming a homogeneous solution with a pH value of 8.10. The solution was heated at 120 °C for 2 days. Colorless crystals of **3** were filtered off, washed with EtOH, dried at 50 °C in an oven, and collected with the yield of 0.1109 g (74.9 %, based on the H<sub>2</sub>OBA reagent). Elemental analysis found/calcd.: C, 56.74/56.94; H, 3.32/2.73 % for **3**. IR (KBr, cm<sup>-1</sup>): 3720(w), 3070(s), 1919(w), 1699(s), 1601(s), 1507(s), 1330(br), 1249(s), 1100(w), 986(m), 870(s), 789(w), 687(w), 613(w), 519(s), 471(w).

**Synthesis of [Rb(HOBA)] (4).** A reaction mixture of H<sub>2</sub>OBA (0.0645 g, 0.25 mmol), RbCl (0.0605 g, 0.5 mmol), DMF (10.0 ml), and H<sub>2</sub>O (1.0 ml) was stirred for 20 min at room temperature forming a homogeneous solution with a pH value of 5.87. The solution was heated at 120 °C for 2 days. Colorless crystals of **4** were filtered off, washed with EtOH, dried at 50 °C in an oven, and collected with the yield of 0.075 g (87.5 %, based on H<sub>2</sub>OBA). Elemental analysis found/calcd.: C, 49.16/49.21.; H, 2.93/2.36 % for **4**. IR (KBr, cm<sup>-1</sup>): 3720(w), 3071(s), 1918(w), 1696(s), 1635(s), 1598(s), 1507(s), 1337(s), 1252(s), 1104(w), 986(m), 870(s), 789(w), 691(w), 687(w), 610(w), 518(s), 478(w).

**Synthesis of [Cs(HOBA)] (5).** A reaction mixture of H<sub>2</sub>OBA (0.0645 g, 0.25 mmol), CsCl (0.0842 g, 0.5 mmol), DMF (10.0 ml), and H<sub>2</sub>O (1.0 ml) was stirred for 20 min at room temperature forming a homogeneous solution with a pH value of 6.11. The solution was heated at 120 °C for 2 days. Colorless crystals of **5** were filtered off, washed with ethanol (EtOH), dried at 50 °C in an oven, and collected with the yield of 0.097 g (99.0 %, based on H<sub>2</sub>OBA). Elemental analysis found/calcd.: C, 43.14/43.21; H, 2.53/2.07 % for **5**. IR (KBr,

cm<sup>-1</sup>): 3075(s), 2988(w), 2785(w), 2596(w), 2434(s), 2261(w), 1920(w), 1635(s), 1594(s), 1502(s), 1414(w), 1337(s), 1259(s), 1104(s), 951(br), 867(s), 782(s), 684(s), 610(w), 521(s), 481(s).

**Synthesis of [Mg(OBA)(H<sub>2</sub>O)<sub>2</sub>] (6).** A reaction mixture of H<sub>2</sub>OBA (0.1032 g, 0.4 mmol), Mg(NO<sub>3</sub>)<sub>2</sub>·6H<sub>2</sub>O (0.01025 g, 0.4 mmol), ethanol (EtOH, 5.0 ml), and H<sub>2</sub>O (1.0 ml) was stirred for 20 min at room temperature forming a homogeneous solution with a pH value of 3.58. The solution was heated at 150 °C for 2 days. Colorless crystals of **6** were filtered off, washed with EtOH, dried at 50 °C in an oven, and collected with the yield of 0.0684 g (54.0 %, based on H<sub>2</sub>OBA). Elemental analysis found/calcd.: C, 52.98/53.12; H, 4.15/3.82 % for **6**. IR (KBr, cm<sup>-1</sup>): 3614(w), 3204(b), 1598(s), 1536(s), 1410(s), 1254(s), 1159(m), 1105(w), 875(w), 786(m), 700(w), 658(w), 512(w).

**Synthesis of [Ca(OBA)(H<sub>2</sub>O)] (7).** A reaction mixture of H<sub>2</sub>OBA (0.0516 g, 0.2 mmol), Ca(NO<sub>3</sub>)<sub>2</sub>·4H<sub>2</sub>O (0.0945 g, 0.4 mmol), DMF (7.0 ml), ethanol (2.0 ml), and H<sub>2</sub>O (1.0 ml) was stirred for 20 min at room temperature forming a homogeneous solution with a pH value of 4.41. The solution was heated at 90 °C for 2 days. Colorless crystals of **7** were filtered off, washed with EtOH, dried at 50 °C in an oven, and collected with the yield of 0.051 g (93.7 %, based on H<sub>2</sub>OBA). Elemental analysis found/calcd.: C, 53.37/53.49; H, 3.98/3.20 % for **7**. IR (KBr, cm<sup>-1</sup>): 3337(w), 1602(s), 1539(m), 1399(s), 1357(s), 1254(s), 1162(m), 1099(w), 862(w), 786(s), 697(w), 619(w), 469(w).

**Synthesis of [Sr(OBA)(H<sub>2</sub>O)] (8).** A reaction mixture of H<sub>2</sub>OBA (0.0516 g, 0.2 mmol), Sr(NO<sub>3</sub>)<sub>2</sub>·4H<sub>2</sub>O (0.1692 g, 0.8 mmol), ethanol (5.0 ml), and H<sub>2</sub>O (1.0 ml) was stirred for 20 min at room temperature forming a homogeneous solution with a pH value of 4.25. The solution was heated at 120 °C for 2 days. Colorless crystals of **8** were filtered off, washed with EtOH, dried at 50 °C in an oven, and collected with the yield of 0.063 g (87.1 %, based on H<sub>2</sub>OBA). Elemental analysis found/calcd.: C, 46.20/46.47; H, 3.04/2.78 % for **8**. IR (KBr, cm<sup>-1</sup>): 3530(m), 3176(s), 1598(s), 1532(s), 1414(s), 1254(s), 1160(m), 1094(w), 855(m), 786(m), 700(m), 655(m), 612(w), 549(w).

(a) compound 1

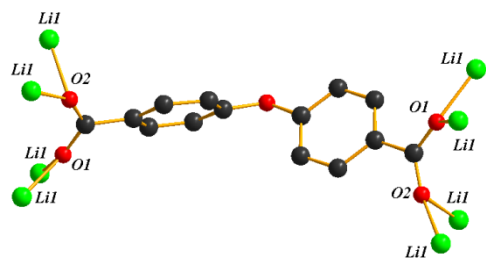

(b) compound 2

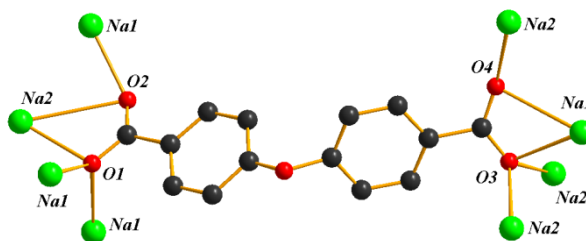

(c) compound 3

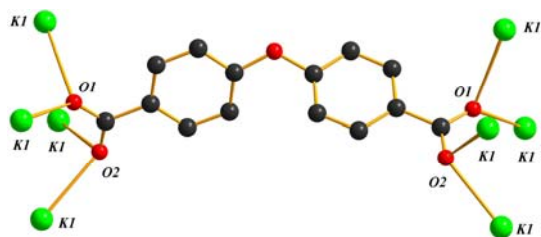

(d) compound 6

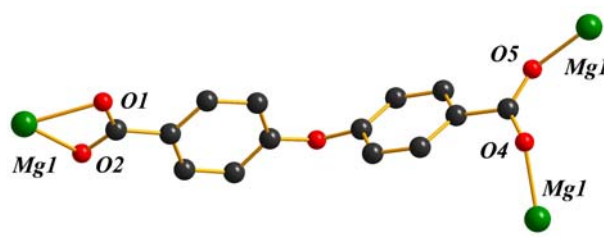

(e) compound 7

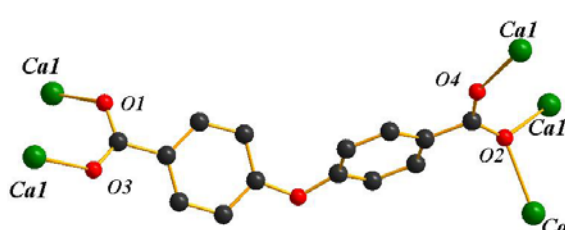

(f) compound 8

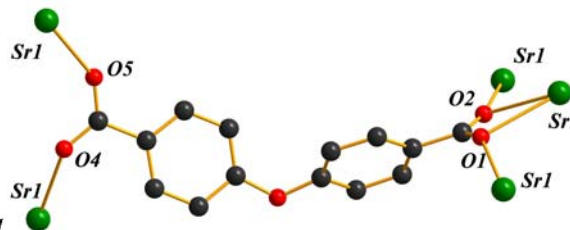

Fig. S1. The coordination models of OBA ligand in 1–3 and 6–8.

Compound (2)

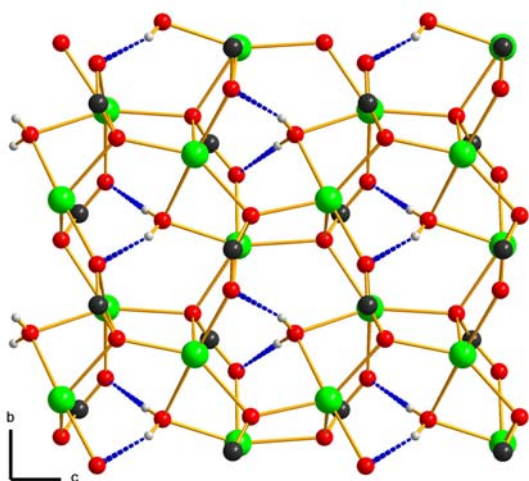

Compound (3)

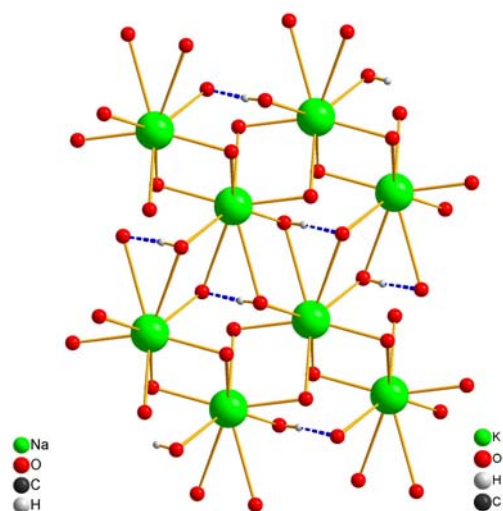

Compound (6)

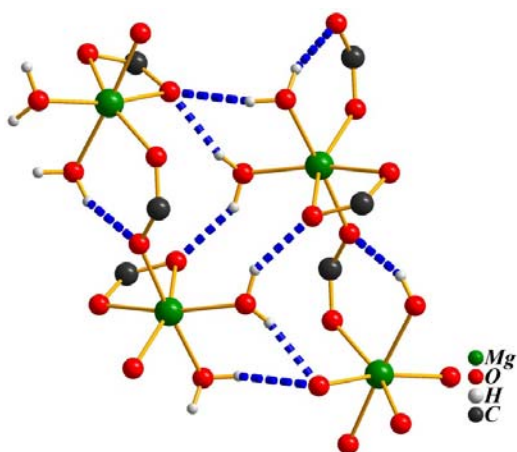

Compound (7)

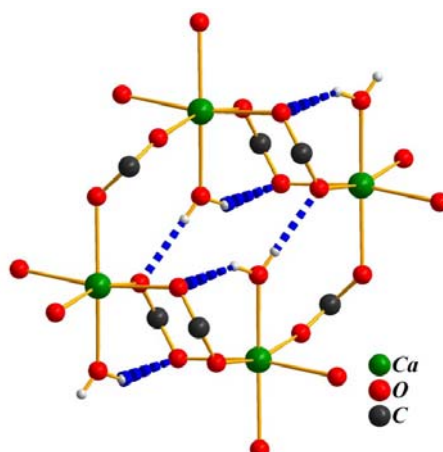

Compound (8)

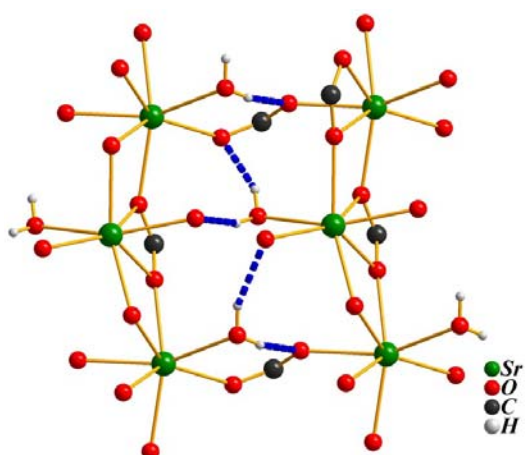

Fig. S2. The diagrams of H-nbonding interactions of 2–3 and 6–8.

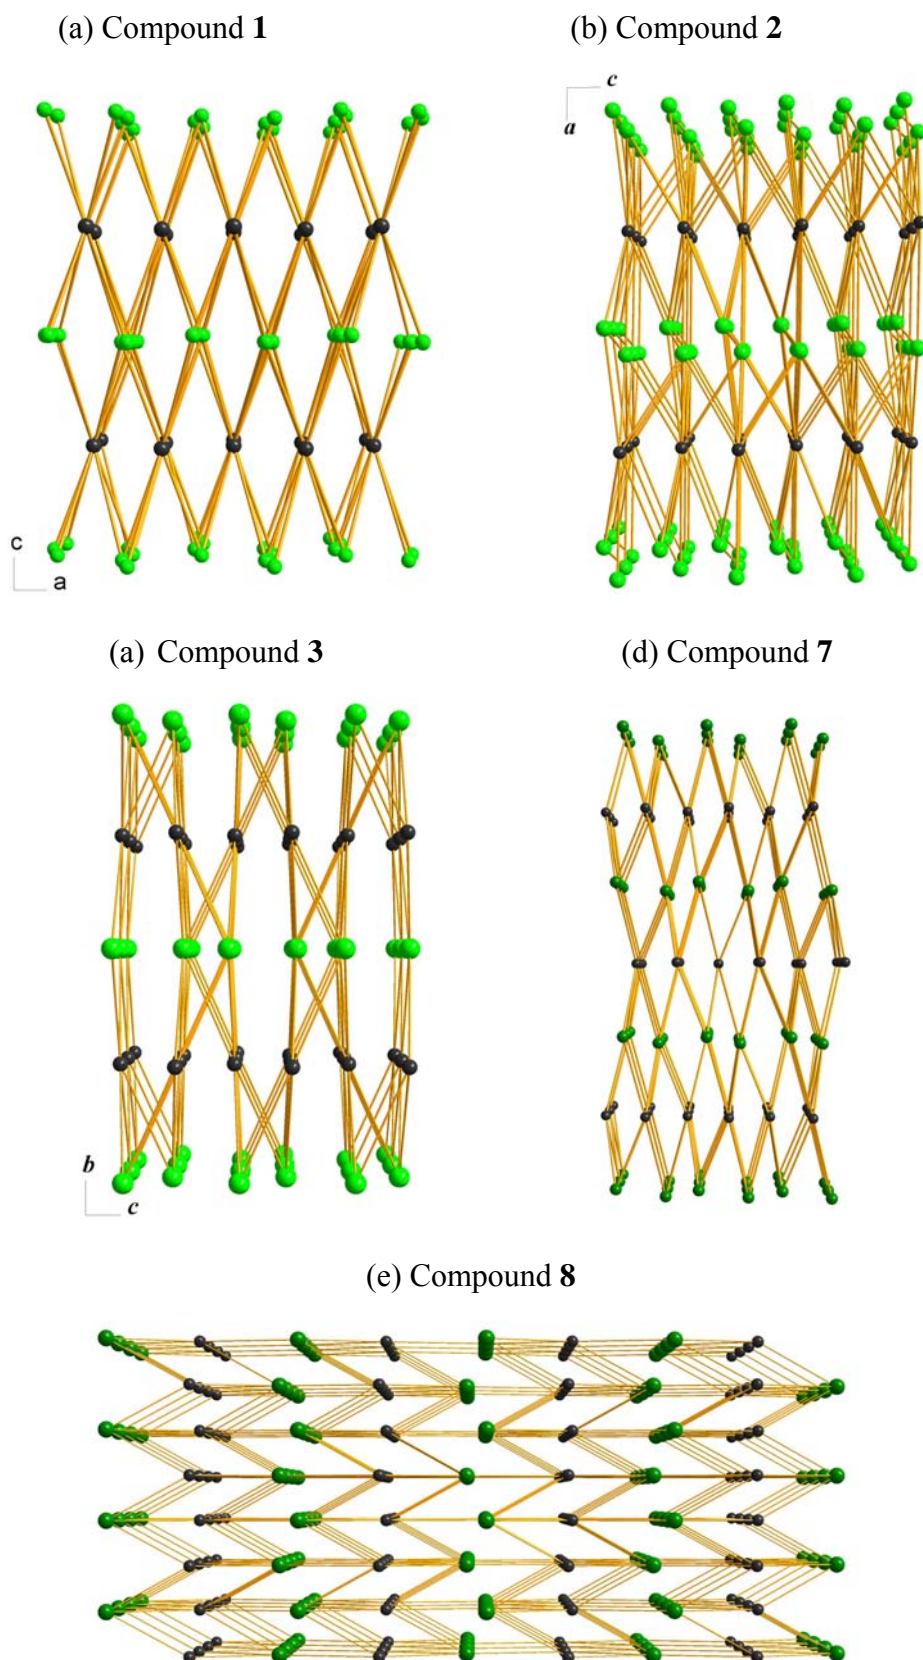

Fig. S3. The schematic descriptions of the 3D topology of 1–3 and 7–8.



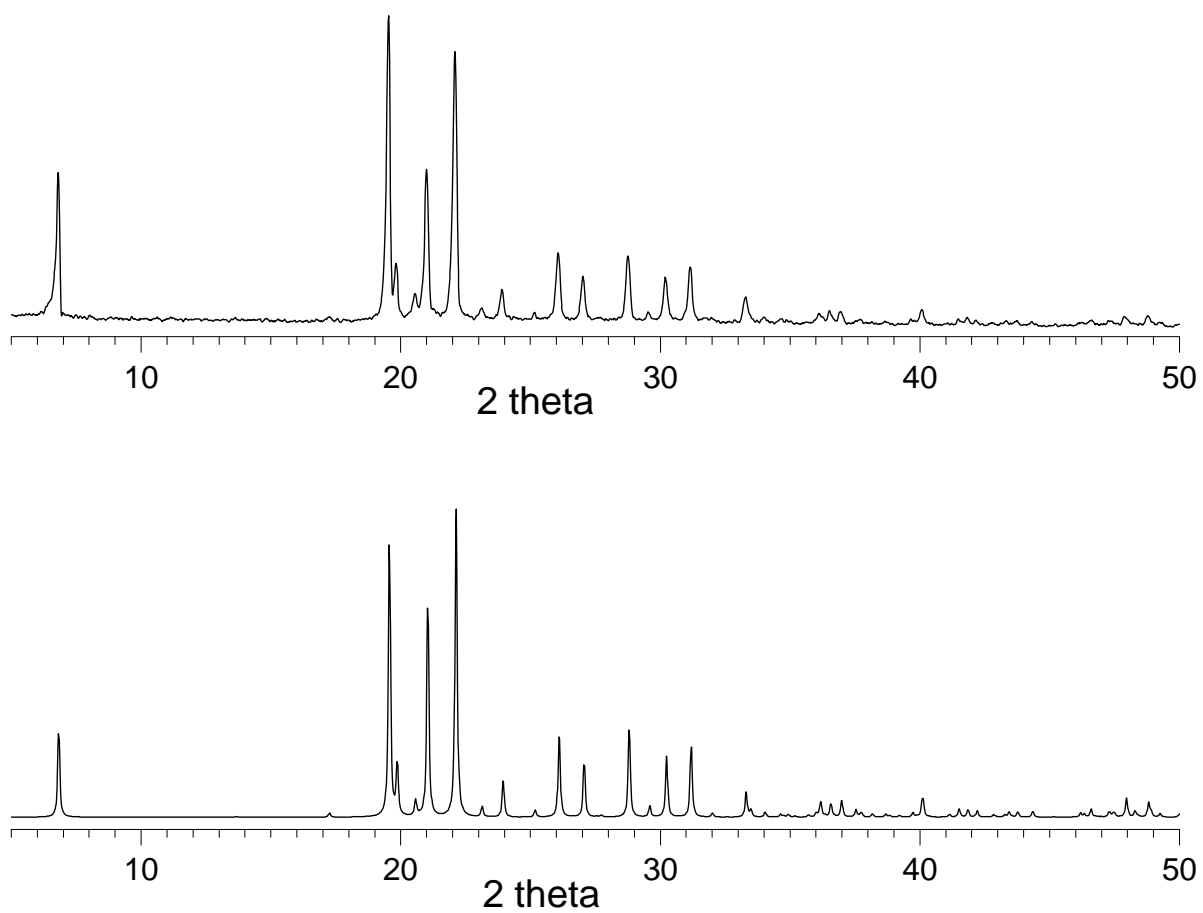

Fig. S4. Powder XRD patterns of **1** (measured, top; calculated, bottom).

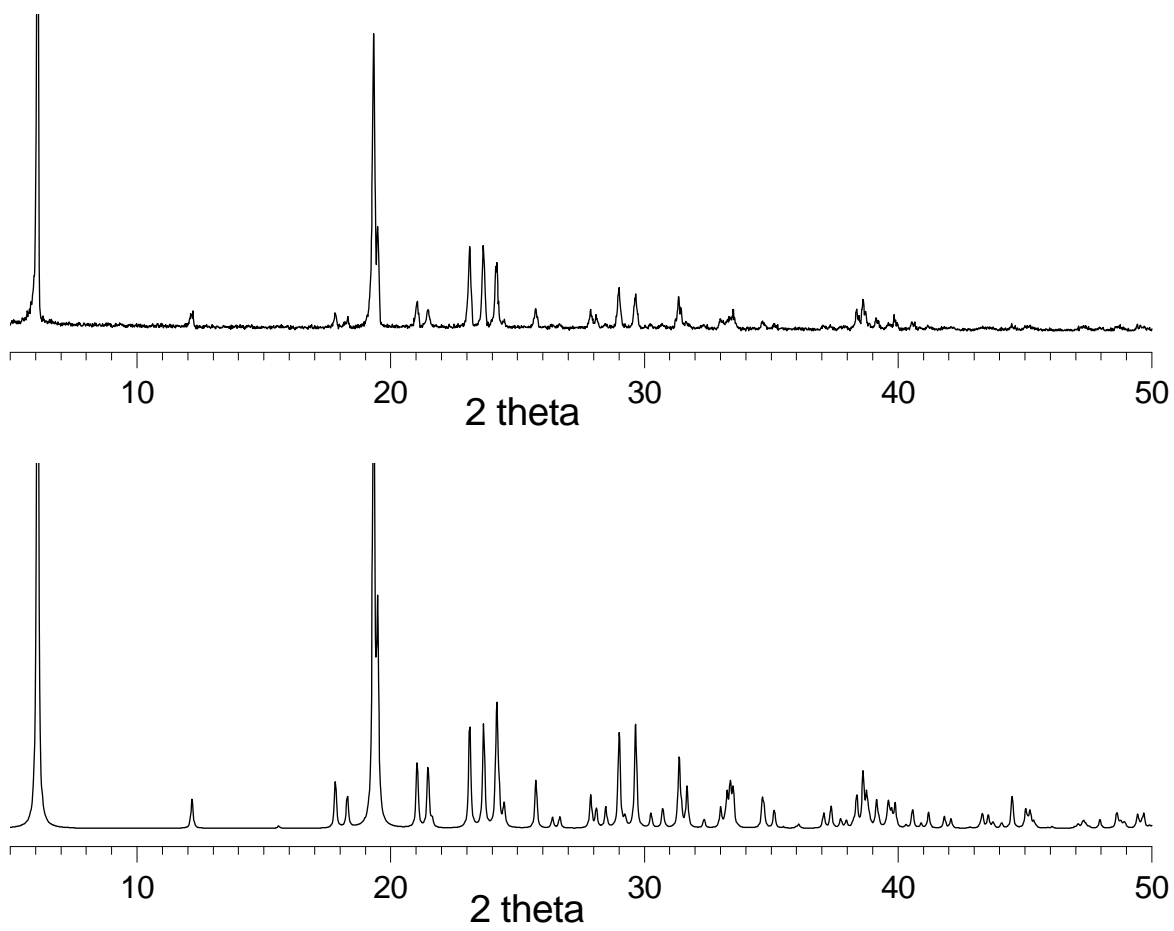

Fig. S5. Powder XRD patterns of **2** (measured, top; calculated, bottom).

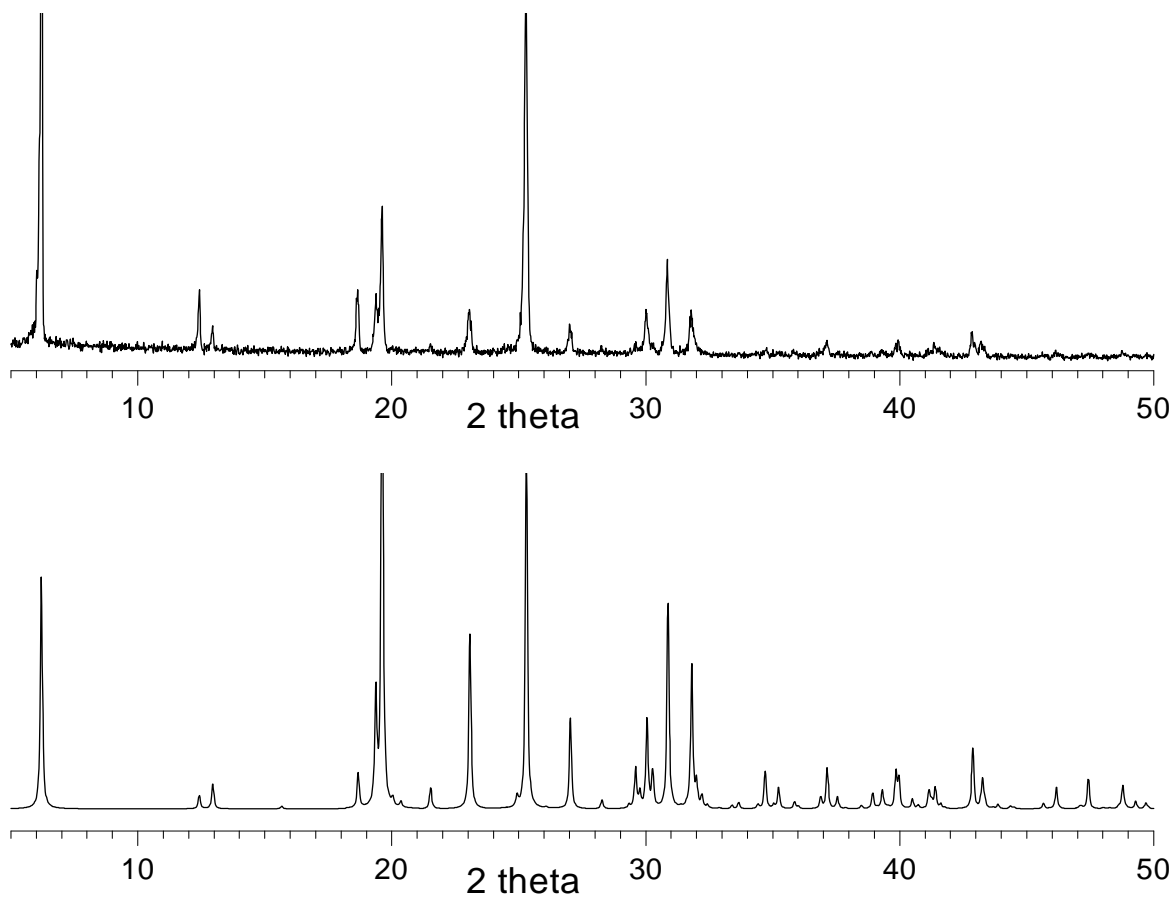

Fig. S6. Powder XRD patterns of **3** (measured, top; calculated, bottom).

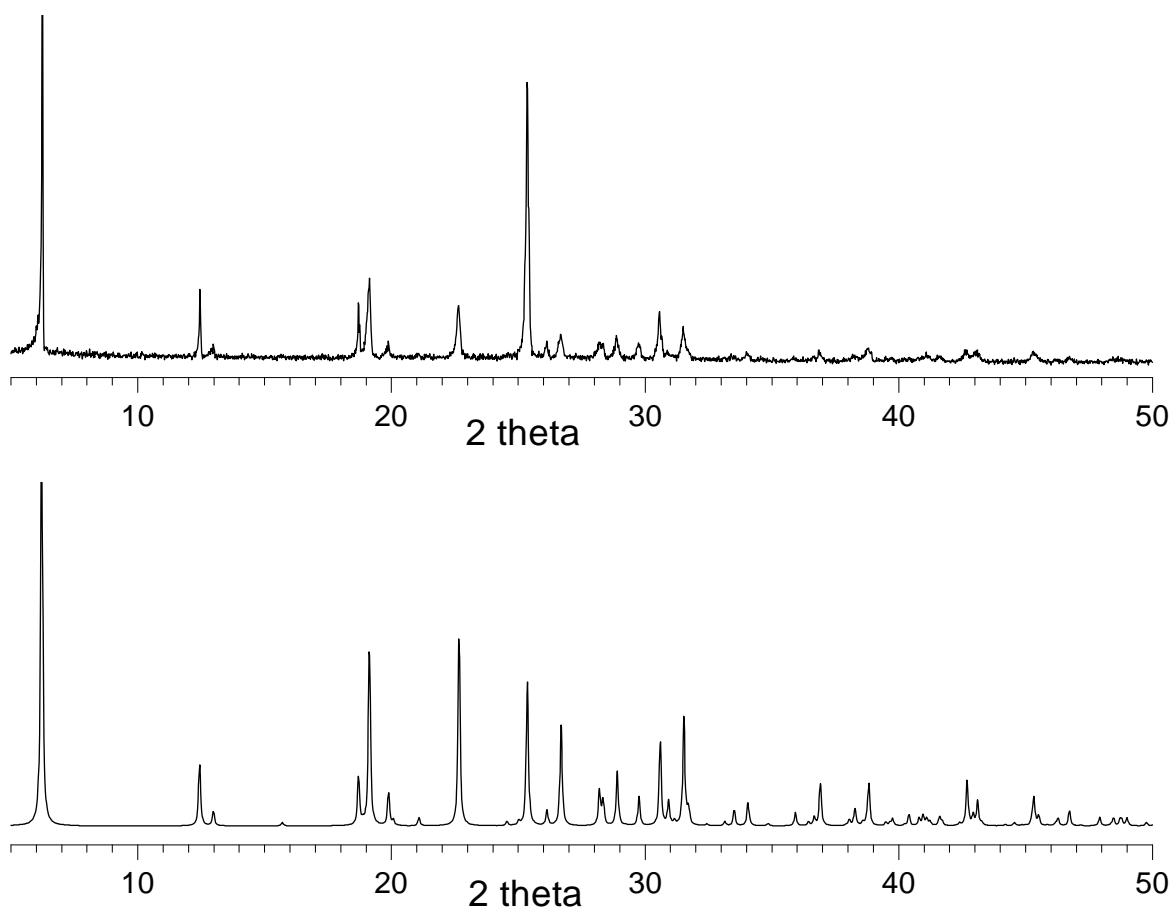

Fig. S7. Powder XRD patterns of **4** (measured, top; calculated, bottom).

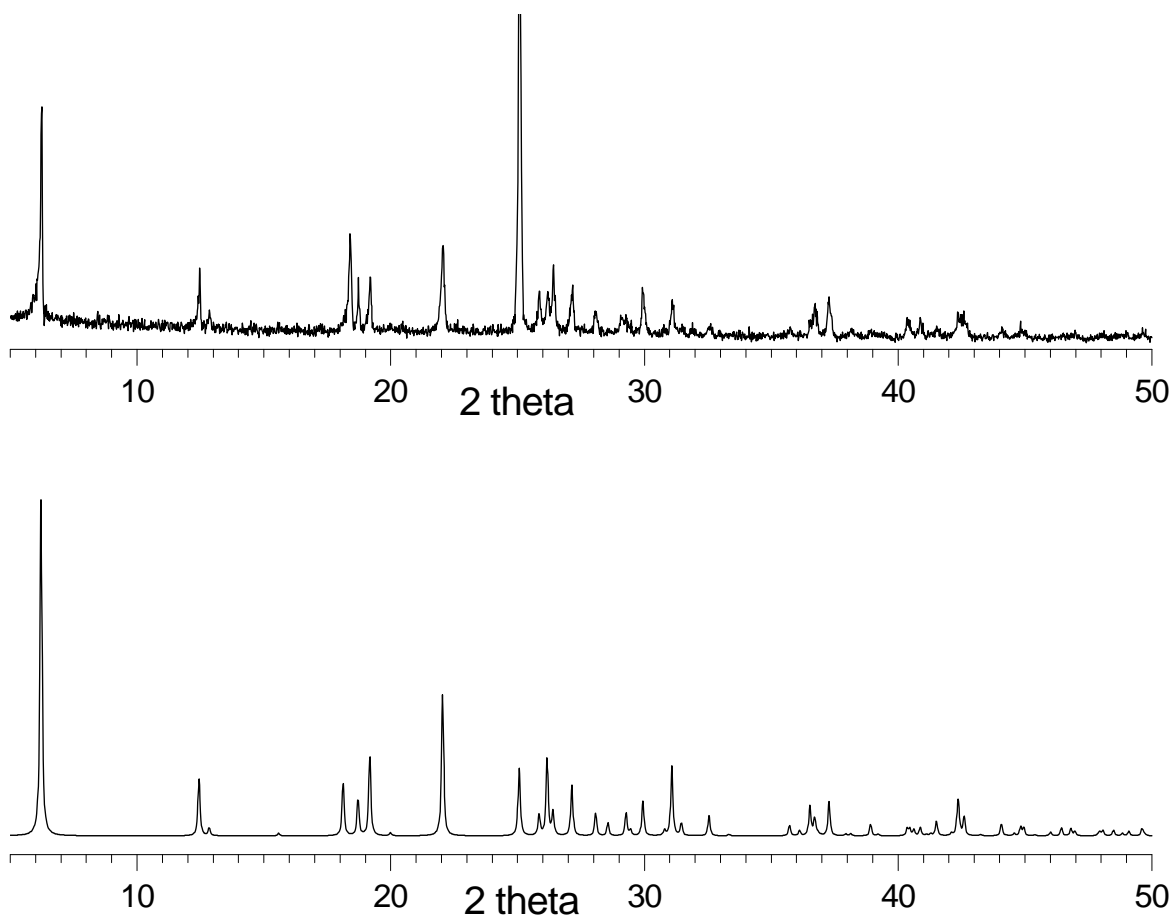

Fig. S8. Powder XRD patterns of **5** (measured, top; calculated, bottom).

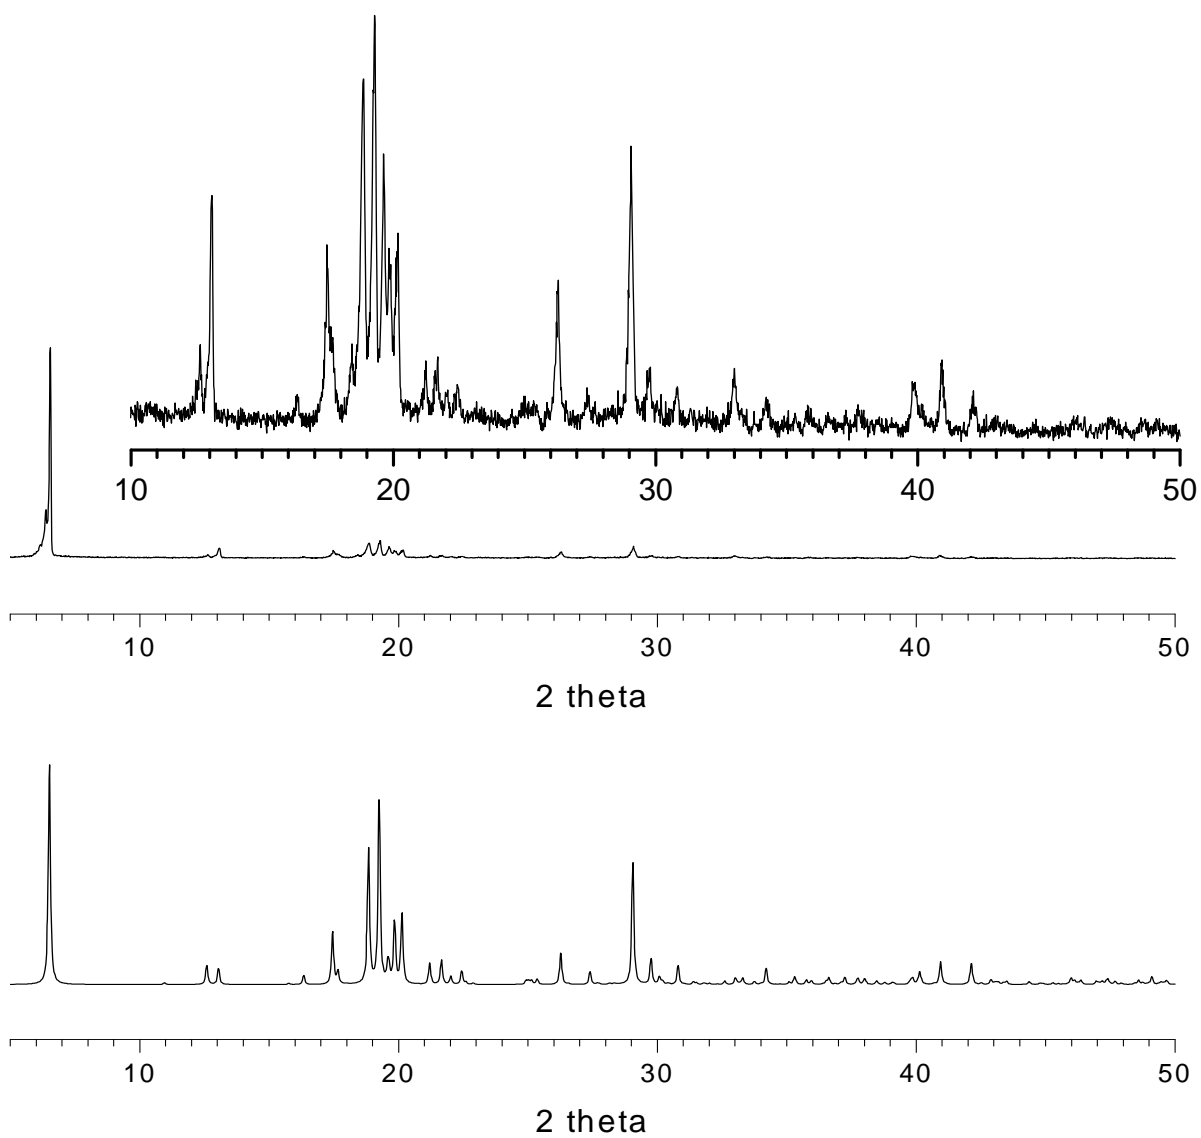

Fig. S9. Powder XRD patterns of **6** (measured, top; calculated, bottom).

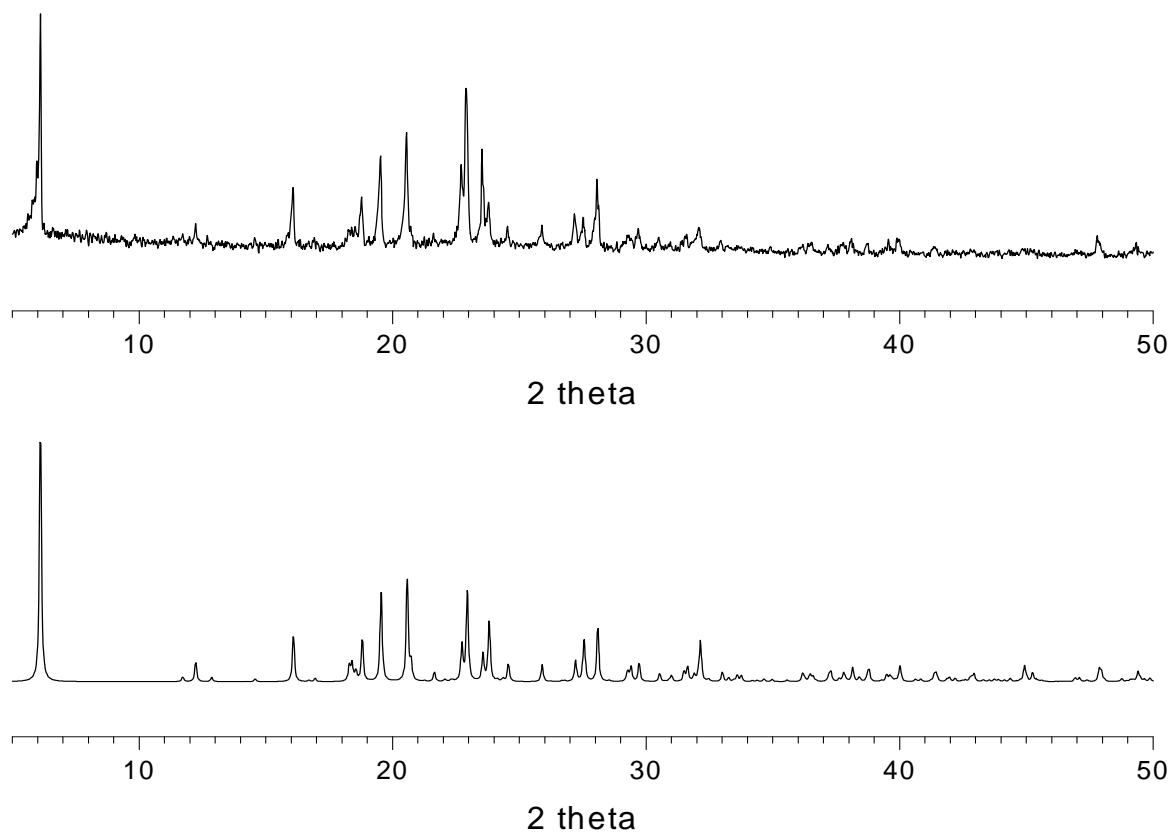

Fig. S10. Powder XRD patterns of **7** (measured, top; calculated, bottom).

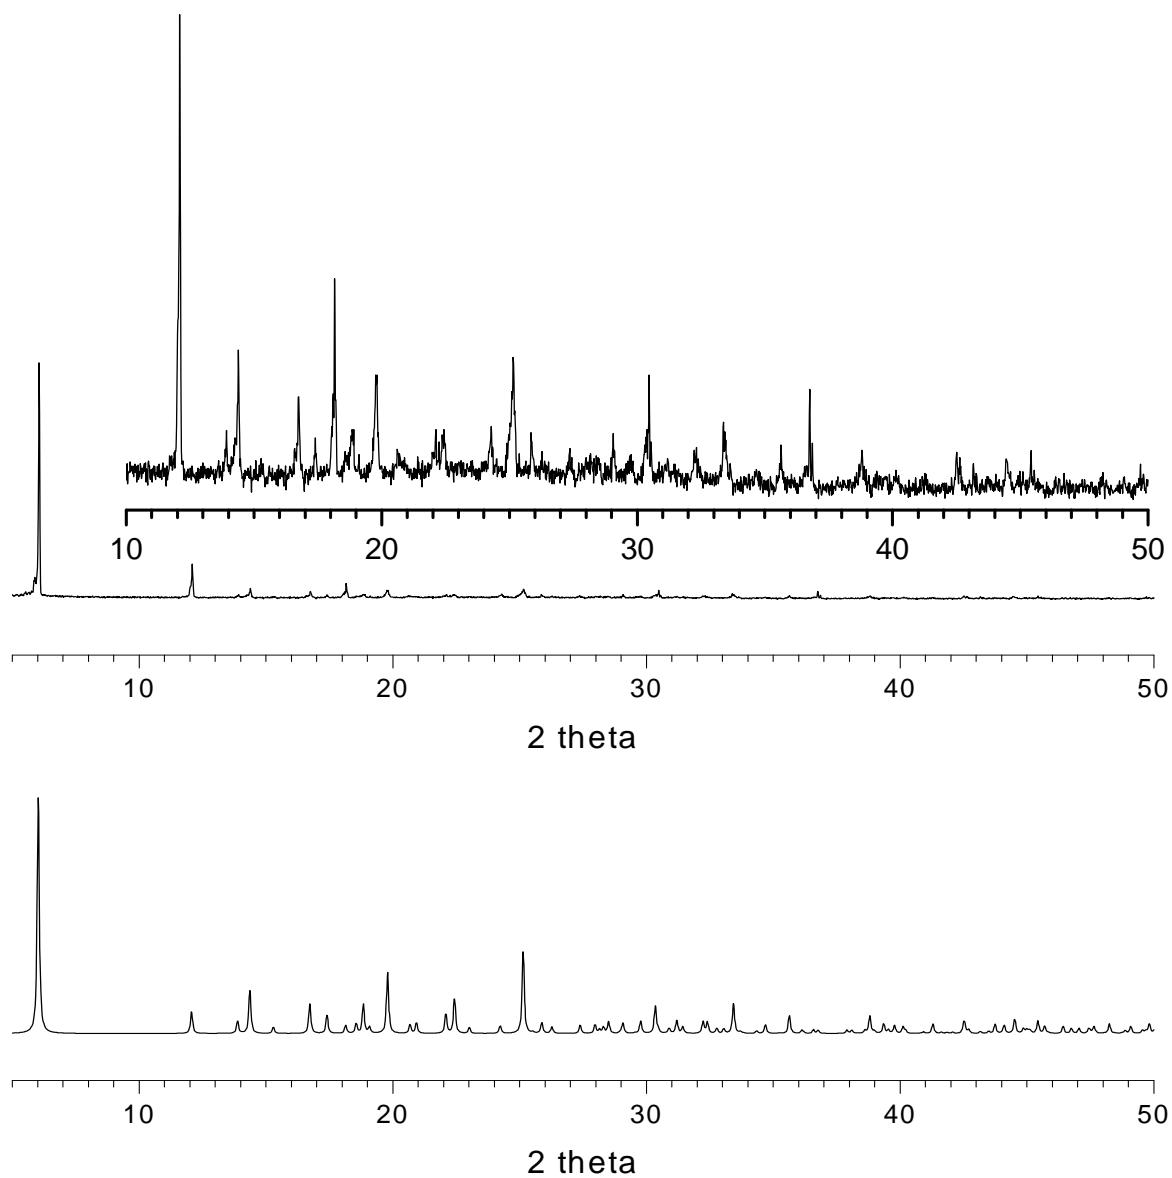

Fig. S11. Powder XRD patterns of **8** (measured, top; calculated, bottom).



(a) compound 1

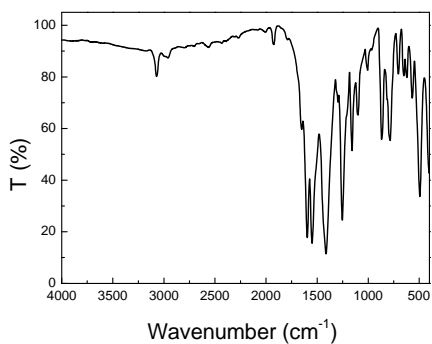

(b) compound 2

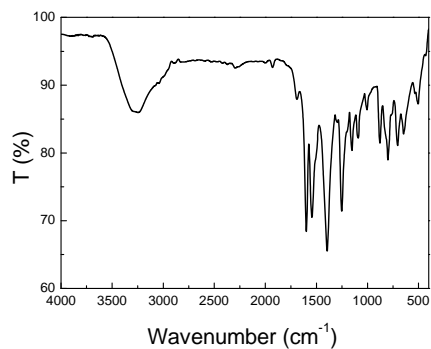

(c) compound 3

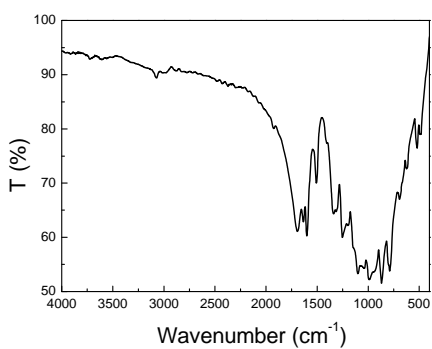

(d) compound 4

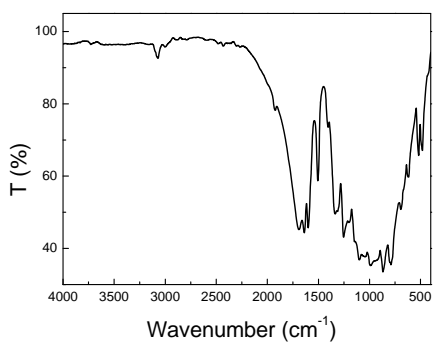

(e) compound 5

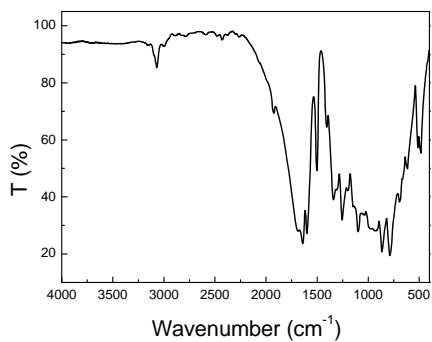

(f) compound 6

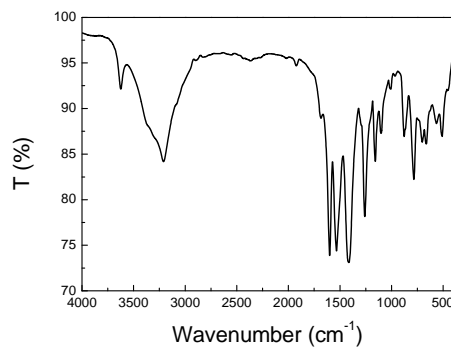

(g) compound 7

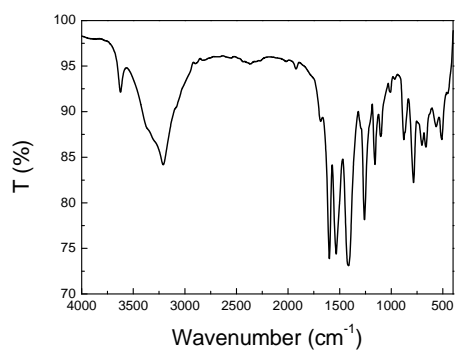

(h) compound 8

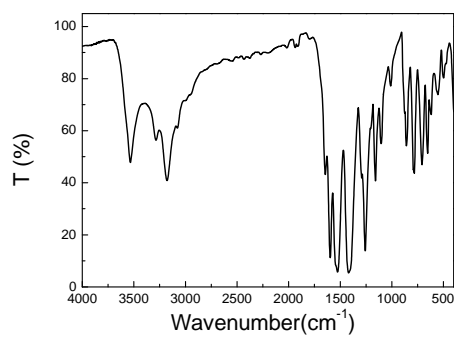

Fig. S12. FT-IR spectra of 1–8.

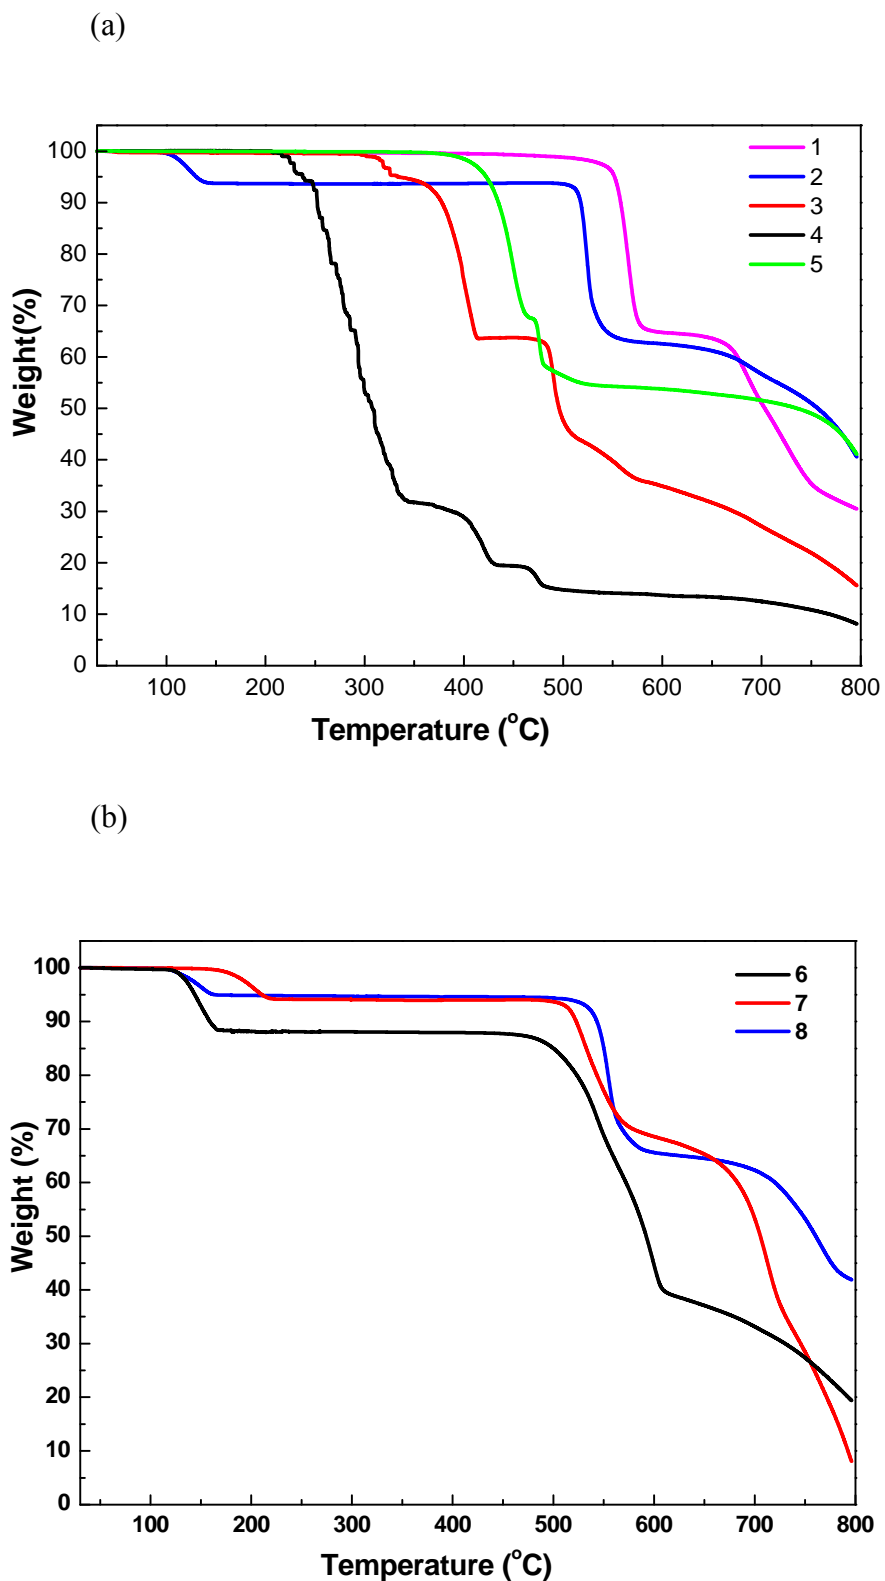

Fig. S13. The TGA curves of (a) 1–5; (b) 6–8.

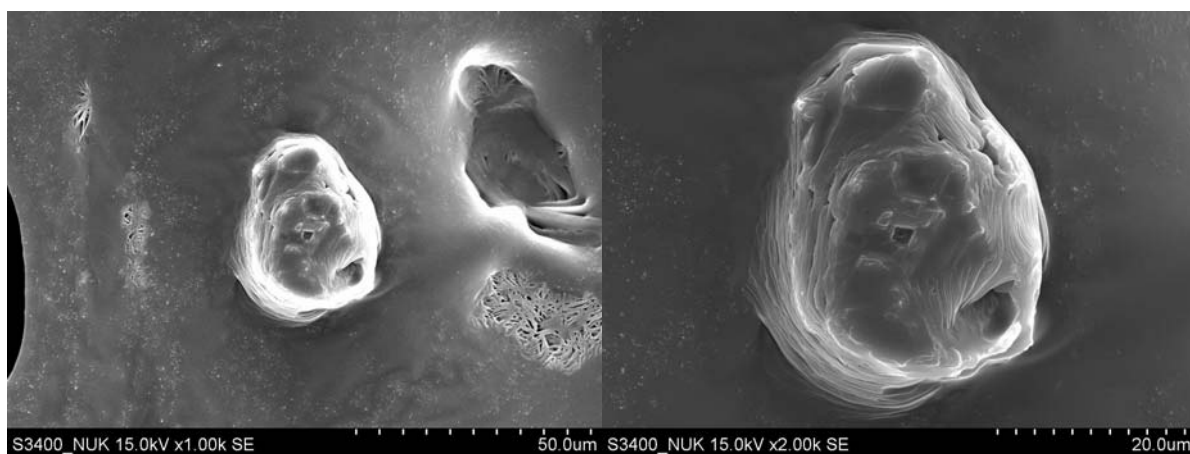

Fig. S14. Scanning electron micrographs for **1**. The particles with sizes ranging from 20 to 30  $\mu\text{m}$  are observed.

(a)

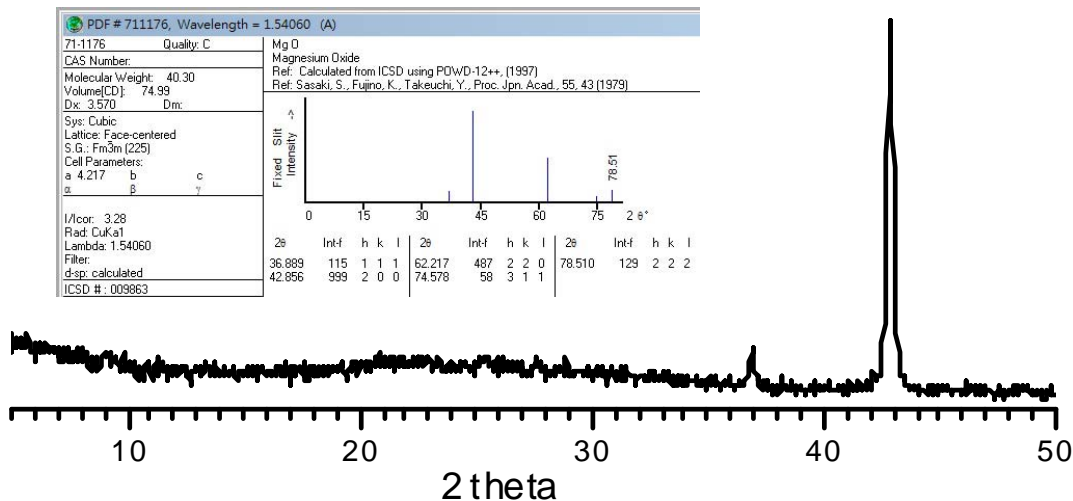

(b)

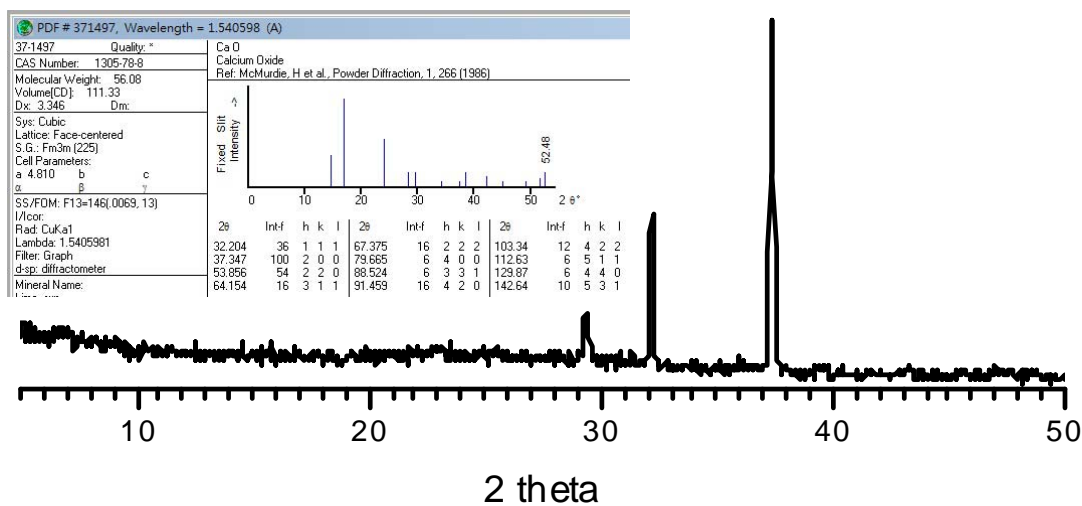

(c)

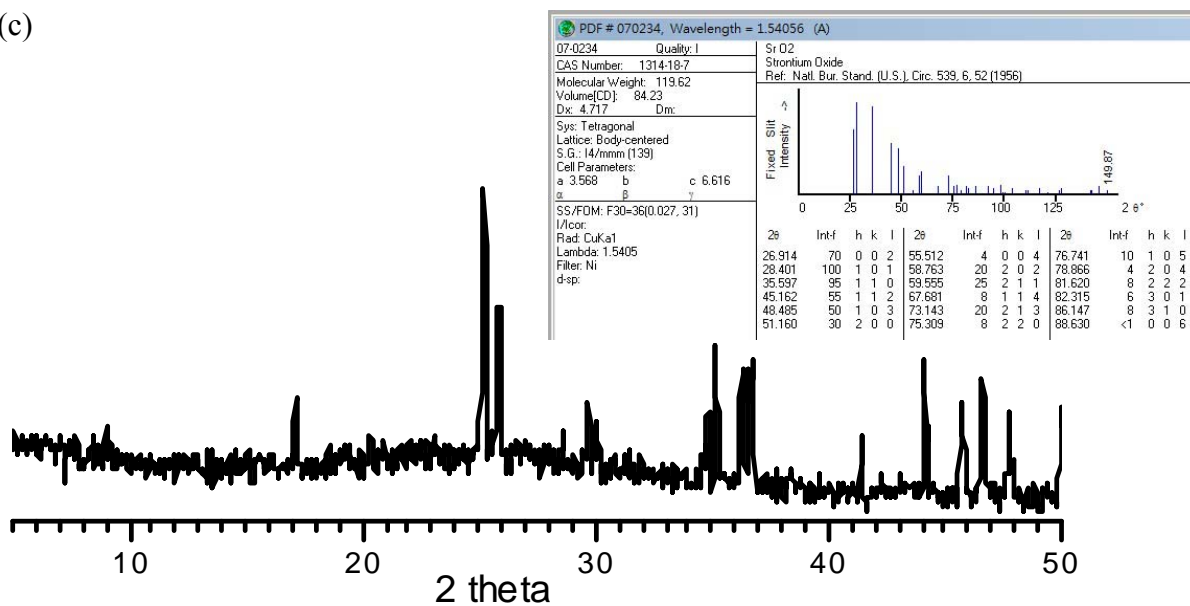

Fig. S15. Powder XRD patterns of residue product of (a) **6**, (b) **7**, and (c) **8** after the TG analysis.

Table S1. Selected bond lengths (Å) for **1–8**.

| <b>1</b>      |            |              |            |
|---------------|------------|--------------|------------|
| Li(1)-O(2)#1  | 1.894(3)   | Li(1)-O(1)   | 2.001(3)   |
| Li(1)-O(1)#2  | 1.924(3)   | Li(1)-O(2)#3 | 2.006(3)   |
| <b>2</b>      |            |              |            |
| Na(1)-O(2)#1  | 2.3457(15) | Na(1)-O(3)#3 | 2.4963(14) |
| Na(1)-O(1W)   | 2.3889(15) | Na(1)-O(1)   | 2.5441(16) |
| Na(1)-O(1)#2  | 2.4446(15) | Na(1)-O(4)#3 | 2.7932(16) |
| Na(2)-O(4)#4  | 2.2944(15) | Na(2)-O(1)   | 2.4408(15) |
| Na(2)-O(3)#3  | 2.3347(15) | Na(2)-O(3)#6 | 2.4830(15) |
| Na(2)-O(1W)#5 | 2.3689(15) |              |            |
| <b>3</b>      |            |              |            |
| K(1)-O(2)#1   | 2.7193(11) | K(1)-O(2)#4  | 2.9993(12) |
| K(1)-O(2)#2   | 2.7193(11) | K(1)-O(2)#5  | 2.9993(12) |
| K(1)-O(1)#3   | 2.8683(11) | K(1)-O(1)#6  | 3.3962(11) |
| K(1)-O(1)     | 2.8683(11) | K(1)-O(1)#7  | 3.3962(11) |
| <b>4</b>      |            |              |            |
| Rb(1)-O(2)#1  | 2.8821(12) | Rb(1)-O(2)#4 | 3.0398(13) |
| Rb(1)-O(2)#2  | 2.8821(12) | Rb(1)-O(2)#5 | 3.0398(13) |
| Rb(1)-O(1)#3  | 3.0158(14) | Rb(1)-O(1)#6 | 3.2836(13) |
| Rb(1)-O(1)    | 3.0158(14) | Rb(1)-O(1)#7 | 3.2836(13) |
| <b>5</b>      |            |              |            |
| Cs(1)-O(1)#1  | 3.0723(16) | Cs(1)-O(2)#4 | 3.2026(18) |
| Cs(1)-O(1)#2  | 3.0723(16) | Cs(1)-O(2)#5 | 3.2026(18) |
| Cs(1)-O(1)#3  | 3.1367(17) | Cs(1)-O(2)#6 | 3.3122(18) |
| Cs(1)-O(1)    | 3.1367(17) | Cs(1)-O(2)#7 | 3.3122(18) |
| <b>6</b>      |            |              |            |
| Mg(1)-O(1W)   | 2.002(3)   | Mg(1)-O(2)   | 2.112(3)   |
| Mg(1)-O(5)#1  | 2.019(3)   | Mg(1)-O(2W)  | 2.120(3)   |
| Mg(1)-O(4)#2  | 2.064(3)   | Mg(1)-O(1)   | 2.169(3)   |
| <b>7</b>      |            |              |            |
| Ca(1)-O(1W)   | 2.2937(10) | Ca(1)-O(1)   | 2.3425(9)  |
| Ca(1)-O(4)    | 2.2994(9)  | Ca(1)-O(2)#1 | 2.3766(8)  |
| Ca(1)-O(2)    | 2.3424(8)  | Ca(1)-O(3)   | 2.3902(9)  |
| <b>8</b>      |            |              |            |
| Sr(1)-O(4)    | 2.496(2)   | Sr(1)-O(1)#2 | 2.540(3)   |
| Sr(1)-O(5)#1  | 2.497(3)   | Sr(1)-O(2)#3 | 2.549(3)   |
| Sr(1)-O(1W)   | 2.543(3)   | Sr(1)-O(1)   | 2.645(3)   |
| Sr(1)-O(2)    | 2.673(4)   |              |            |

Symmetry transformations used to generate equivalent atoms: for complex **1**, #1  $x-1/2, -y-1/2, -z$ , #2  $-x-1/2, y+1/2, z$ , #3  $-x, -y, -z$ ; for complex **2**, #1  $x, -y, z+1/2$ , #2  $x, -y+1, z+1/2$ , #3  $x+1/2, -y+1/2, z+1/2$ , #4  $x+1/2, y+1/2, z$ , #5  $x, -y, z-1/2$ , #6  $x+1/2, y-1/2, z$ ; for complex **3**, #1  $x+1, y, z$ , #2  $-x-1/2, -y, z$ , #3  $-x+1/2, -y, z$ , #4  $-x, -y, z+1$ , #5  $x+1/2, y, z+1$ , #6  $x+1/2, y, -z$ , #7  $-x, -y, -z$ ; for complex **4**, #1  $x+1, y, z$ , #2  $-x-3/2, -y, z$ , #3  $-x-1/2, -y, z$ , #4  $-x-1, -y, z+1$ , #5  $x+1/2, y, z+1$ , #6  $x+1/2, y, -z$ , #7  $-x-1, -y, -z$ ; for complex **5**, #1  $x+1/2, y, z+1$ , #2  $-x, -y+1, z+1$ , #3  $-x+1/2, -y+1, z$ , #4  $x-1/2, y, z+1$ , #5  $-x+1, -y+1, z+1$ , #6  $-x+1/2, -y+1, z-1$ , #7  $x, y, z-1$ ; for complex **6**, #1  $x+1, y, z+1$ , #2  $x+1, -y+1/2, z+1/2$ ; for complex **7**, #1  $-x, -y, z+1$ ; for complex **8** #1  $x, y+1, z$  #2  $-x+1, -y+1, z-1/2$  #3  $-x+1, -y+1, z+1/2$ .

Table S2. Hydrogen Bonding Distance (Å) and Angle (deg) Data for **2–8**.

| D — H ... A         | d(H...A) | d(D...A)   | ∠DHA   | Symmetry Code         |
|---------------------|----------|------------|--------|-----------------------|
| <b>2</b>            |          |            |        |                       |
| O(1W)-H(1)...O(2)   | 1.95     | 2.7998(18) | 174.6  | [x,y,z+1]             |
| O(1W)-H(2)...O(4)   | 2.06     | 2.7910(19) | 163.3  | [x+1/2,y+1/2,z+1]     |
| <b>3</b>            |          |            |        |                       |
| O(1)-H(1)...O(1)    | 1.65     | 2.4643(18) | 174.2  | [-x-1/2,-y,z]         |
| <b>4</b>            |          |            |        |                       |
| O(1)-H(1)...O(1)    | 1.64     | 2.458(2)   | 172.3  | [-x-3/2,-y,z]         |
| <b>5</b>            |          |            |        |                       |
| O(2)-H(2)...O(2)    | 1.67     | 2.466(3)   | 164.8  | [-x+1/2,-y+1,z]       |
| <b>6</b>            |          |            |        |                       |
| O1W-H1WA...O(2)     | 1.928    | 2.664      | 144.17 | [-x+1, y-1/2, -z+1/2] |
| O1W-H1WB...O(1)     | 1.948    | 2.696      | 146.19 | [-x+1, -y, -z]        |
| O2W-H2WA...O(2)     | 2.479    | 3.181      | 140.43 | [-x+1, y-1/2, -z+1/2] |
| O2W-H2WB...O(4)     | 1.964    | 2.751      | 153.56 | [x+1, y, z+1]         |
| <b>7</b>            |          |            |        |                       |
| O1W-H1...O(3)       | 2.028    | 2.789      | 173.06 | [x+1, y, z]           |
| O1W-H2...O(1)       | 2.054    | 2.810      | 148.74 | [-x, -y, -z]          |
| <b>8</b>            |          |            |        |                       |
| O(1W)-H(1WA)...O(5) | 2.31     | 3.091(4)   | 153.6  | [-x+1,-y+1,z+1/2]     |
| O(1W)-H(1WB)...O(4) | 1.95     | 2.759(3)   | 159.1  | [x,y+1,z]             |
